# Supplementary material for: Krempfielins Q and R, Two New Eunicellin-Based Diterpenoids from the Soft Coral Cladiella krempfi
Source: MDPI journal article supplement (doi:10.3390/ijms151221865), 2014-11-27

## Supplementary Information

**Figure S1.** HRESIMS spectrum of compound **1**.

Molecular Formula:  $\text{C}_{26}\text{H}_{42}\text{O}_8\text{Na}$   
Exact Mass: 505.2777  
Measured Mass: 505.2779

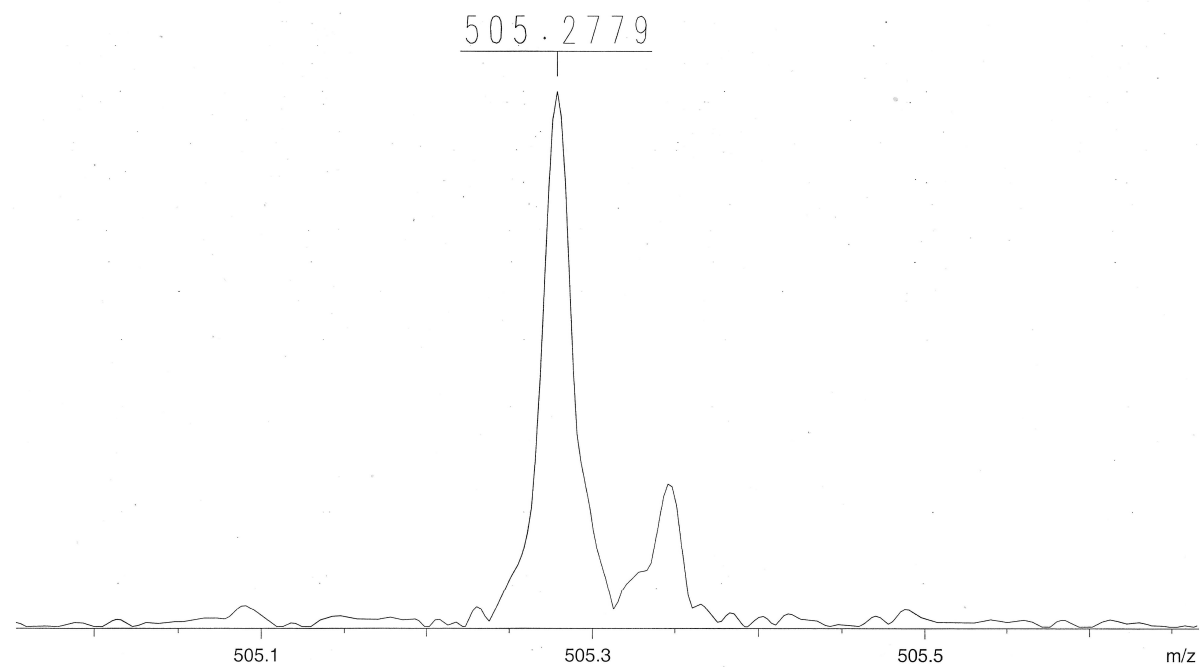

**Figure S2.**  $^{13}\text{C}$  NMR spectrum of compound **1** in  $\text{CDCl}_3$  at 100 MHz.

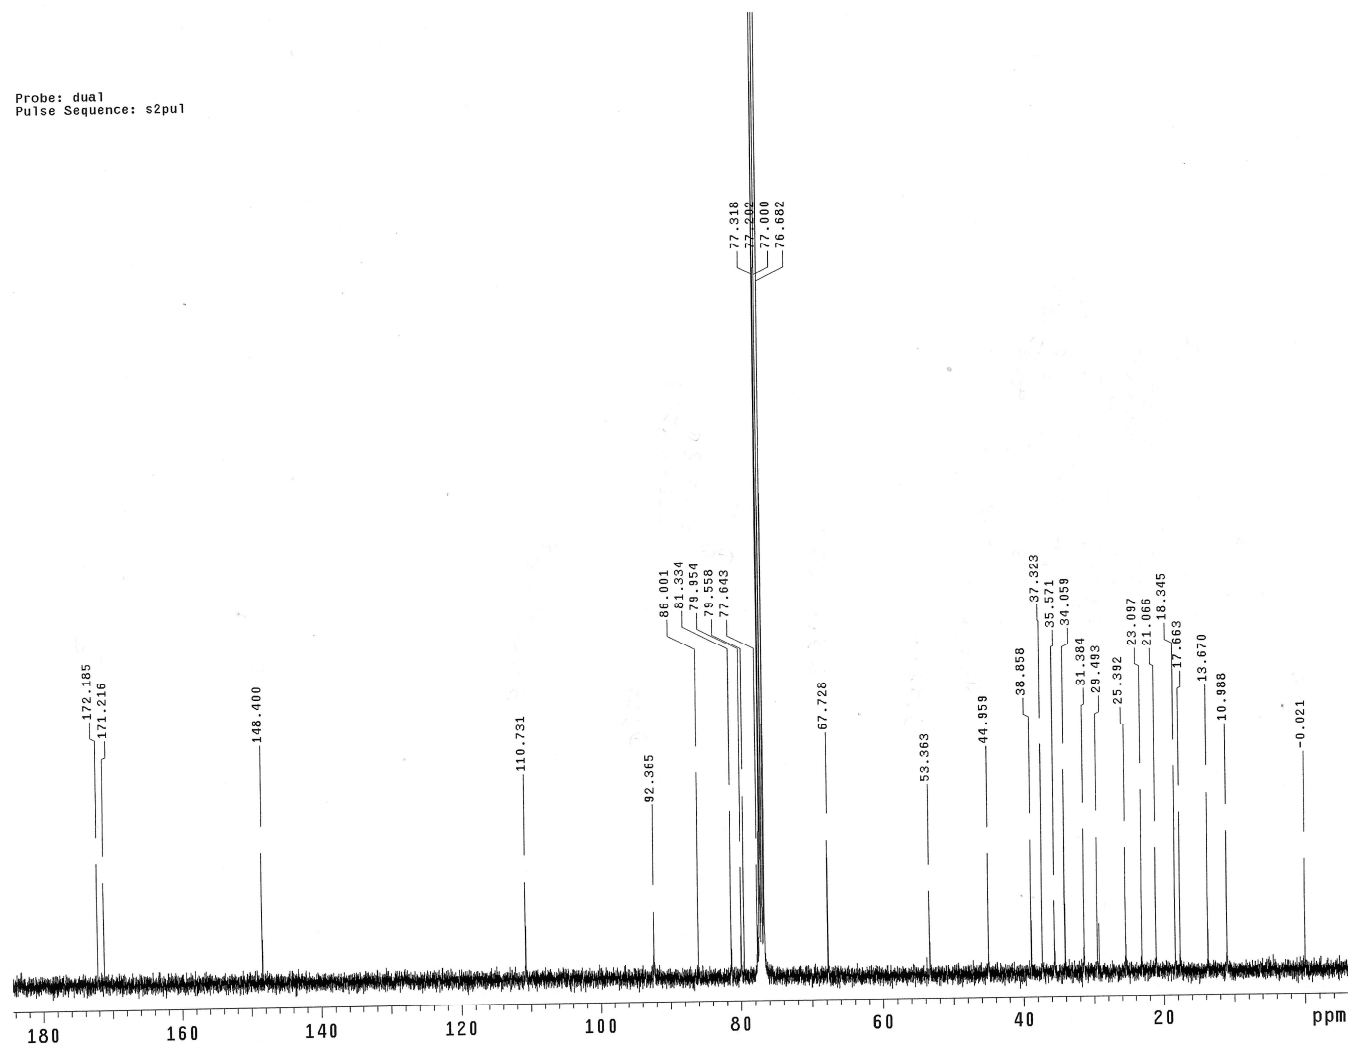

**Figure S3.**  $^1\text{H}$  NMR spectrum of compound **1** in  $\text{CDCl}_3$  at 400 MHz.

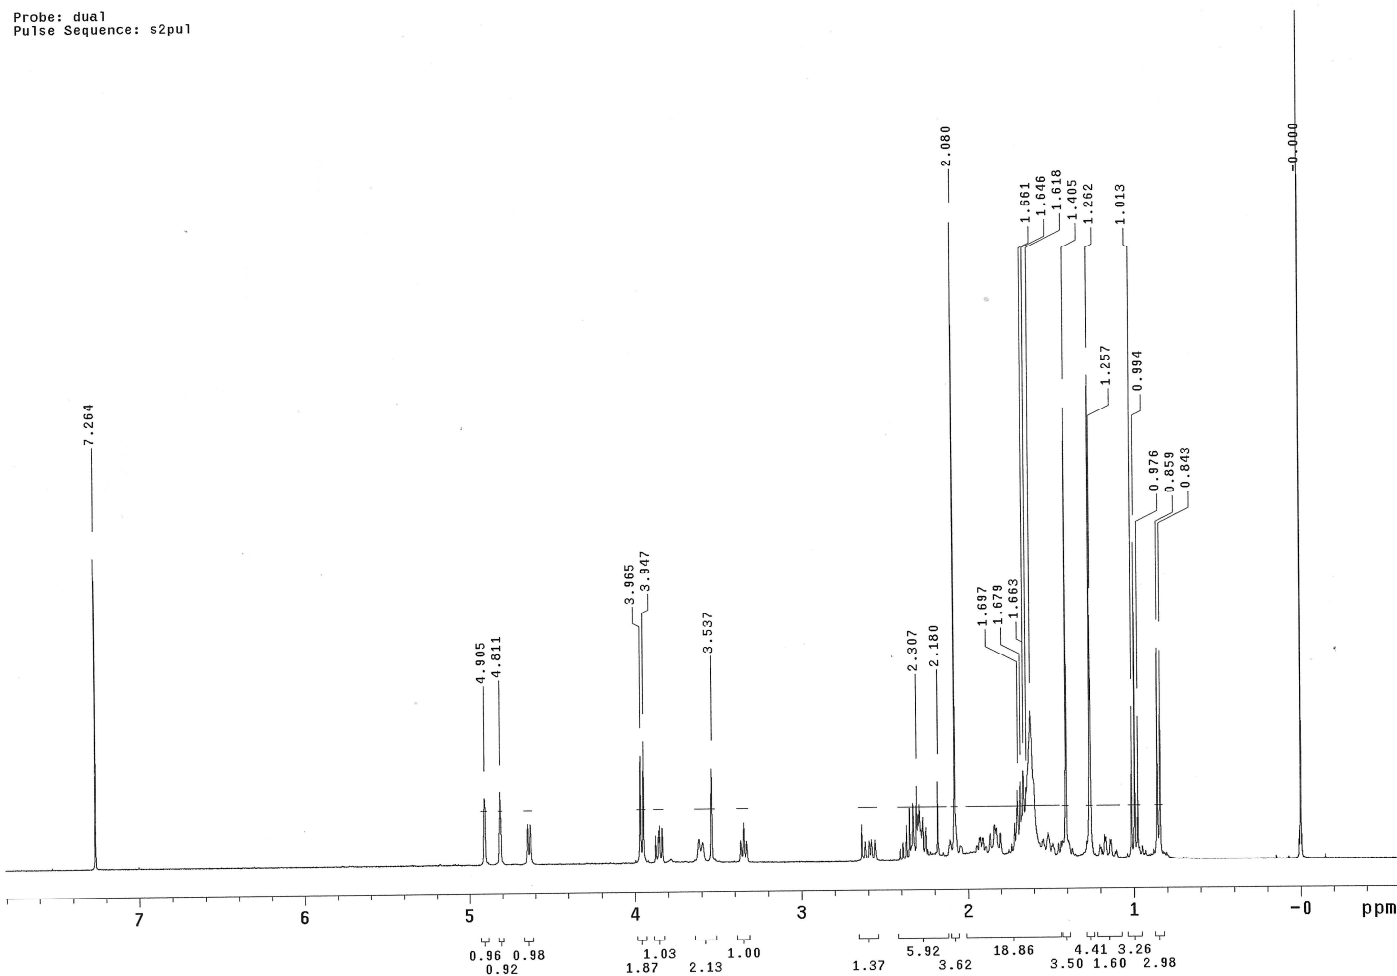

**Figure S4.** HRESIMS spectrum of compound **2**.

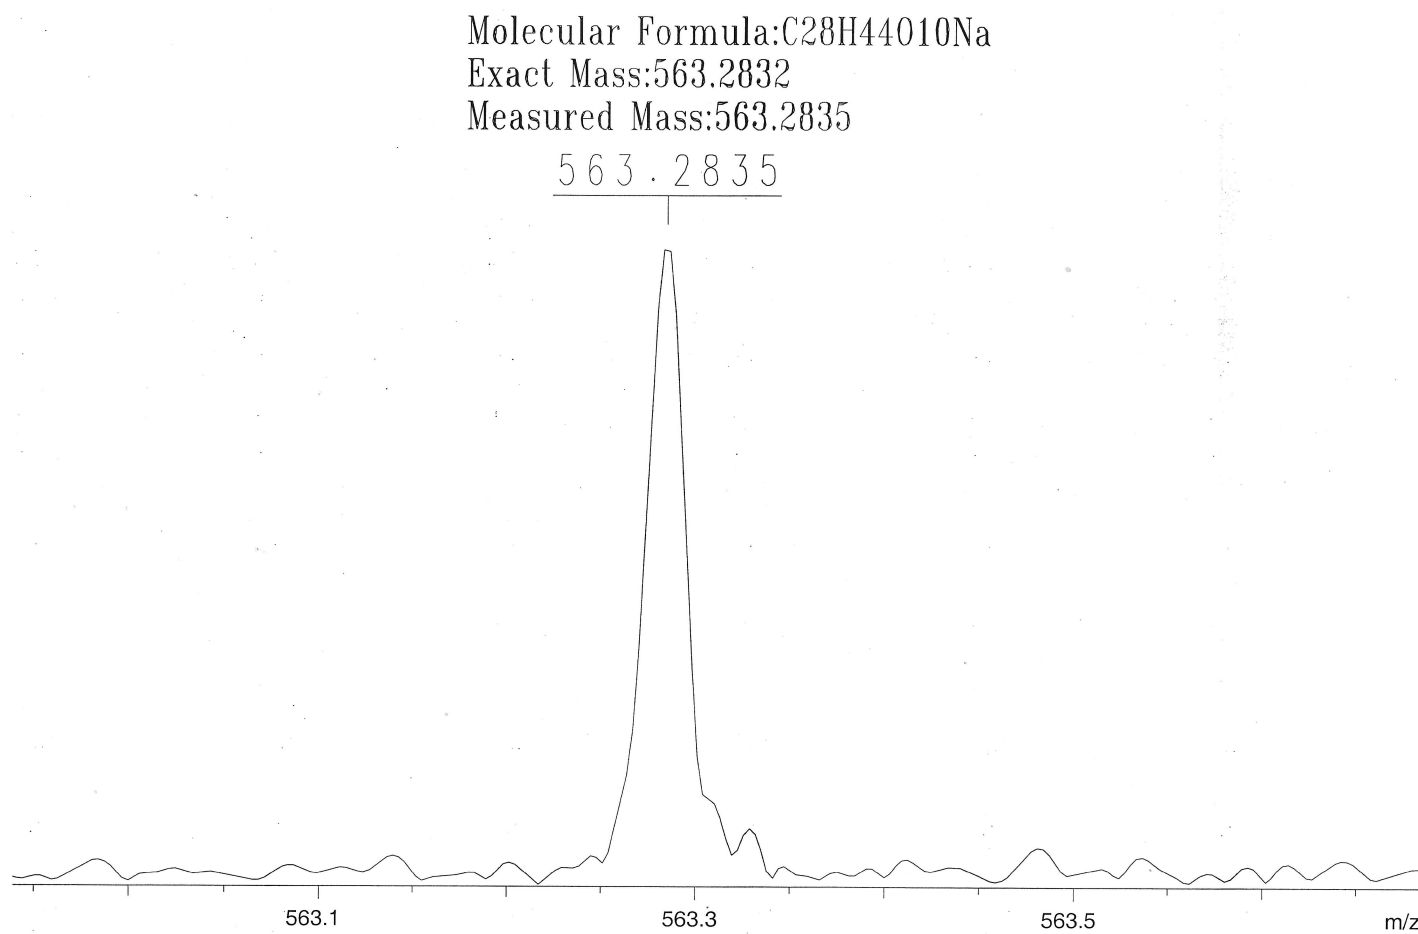

**Figure S5.**  $^{13}\text{C}$  NMR spectrum of **2** in  $\text{CDCl}_3$  at 125 MHz.

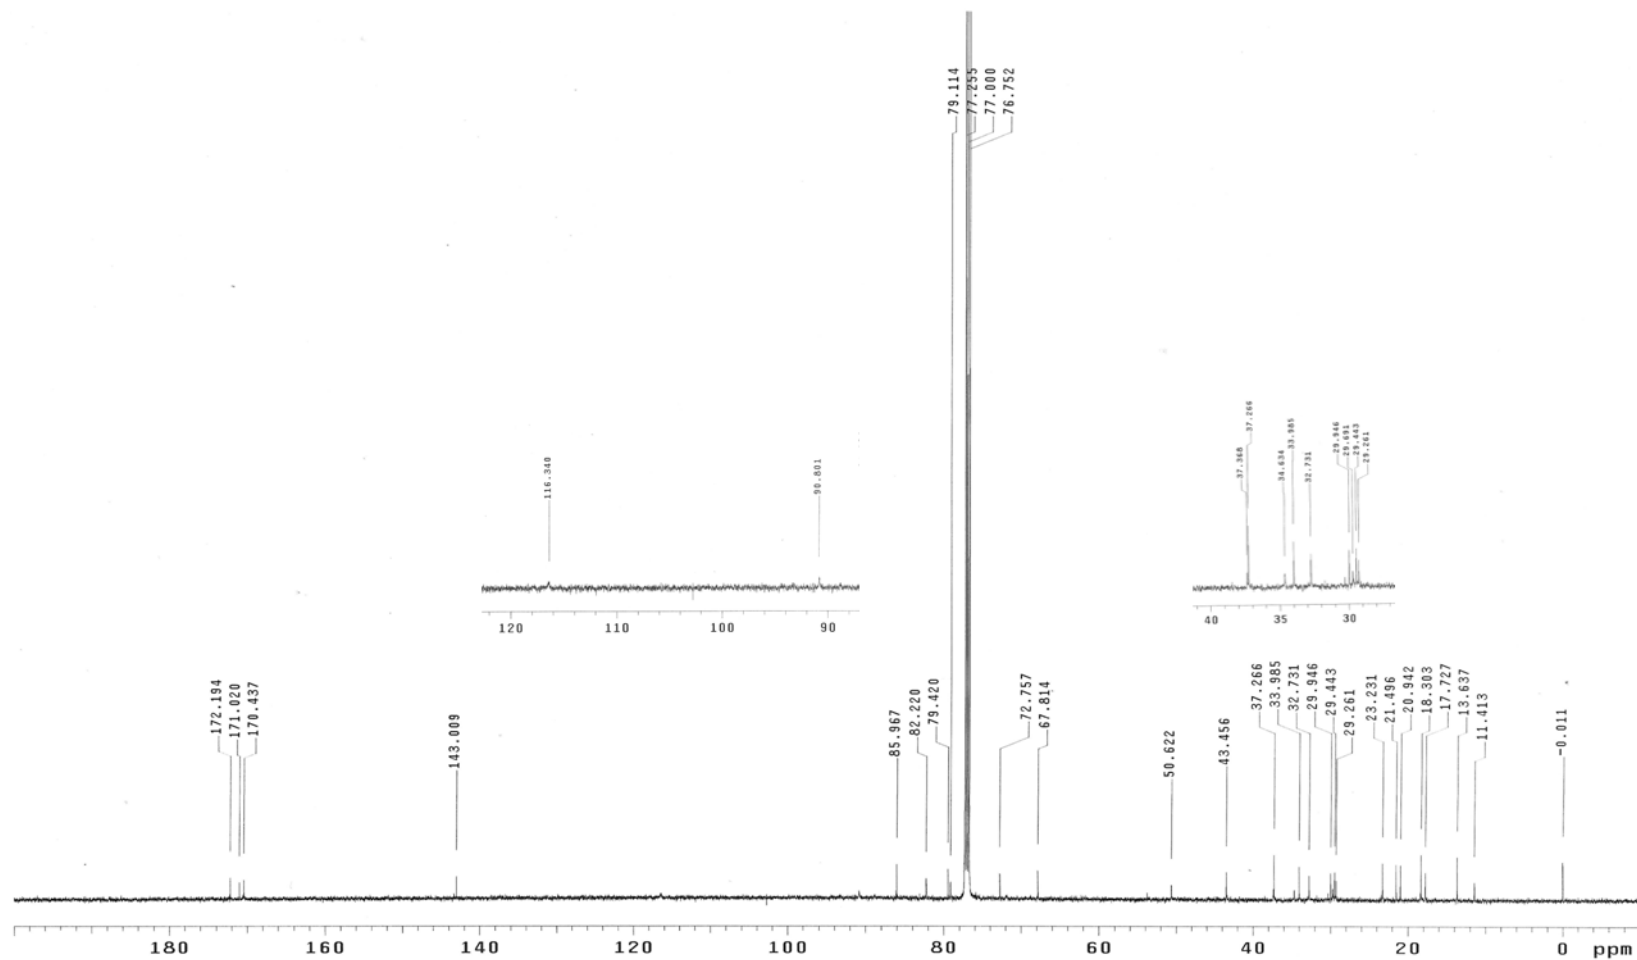

**Figure S6.**  $^1\text{H}$  NMR spectrum of **2** in  $\text{CDCl}_3$  at 500 MHz.

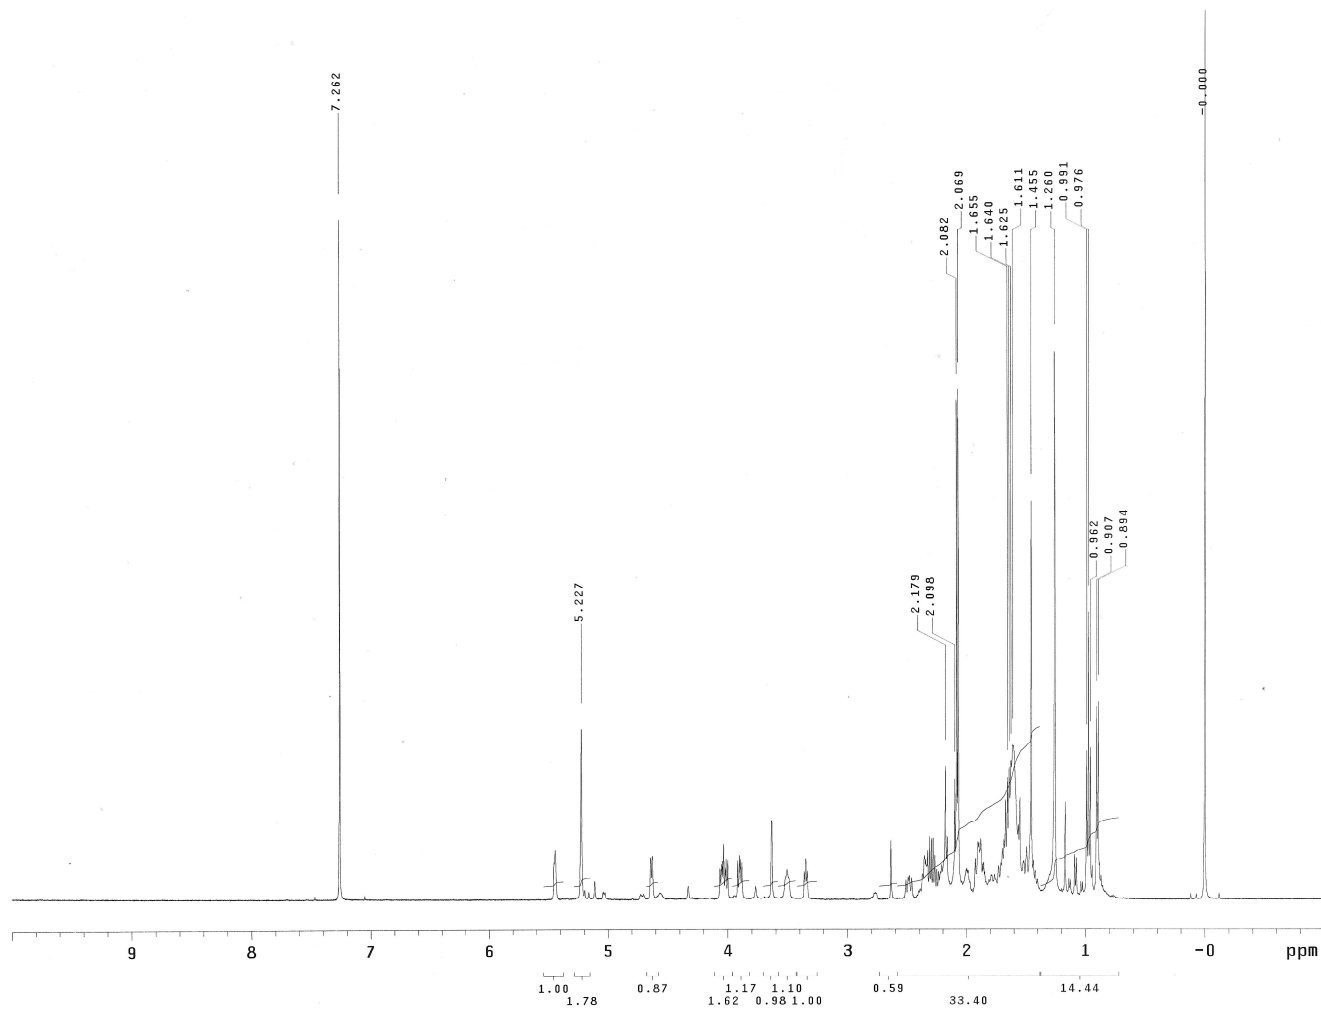

**Figure S7.** Expanded  $^1\text{H}$  NMR spectrum ( $\delta$  3.3–5.5 ppm) of **2**.

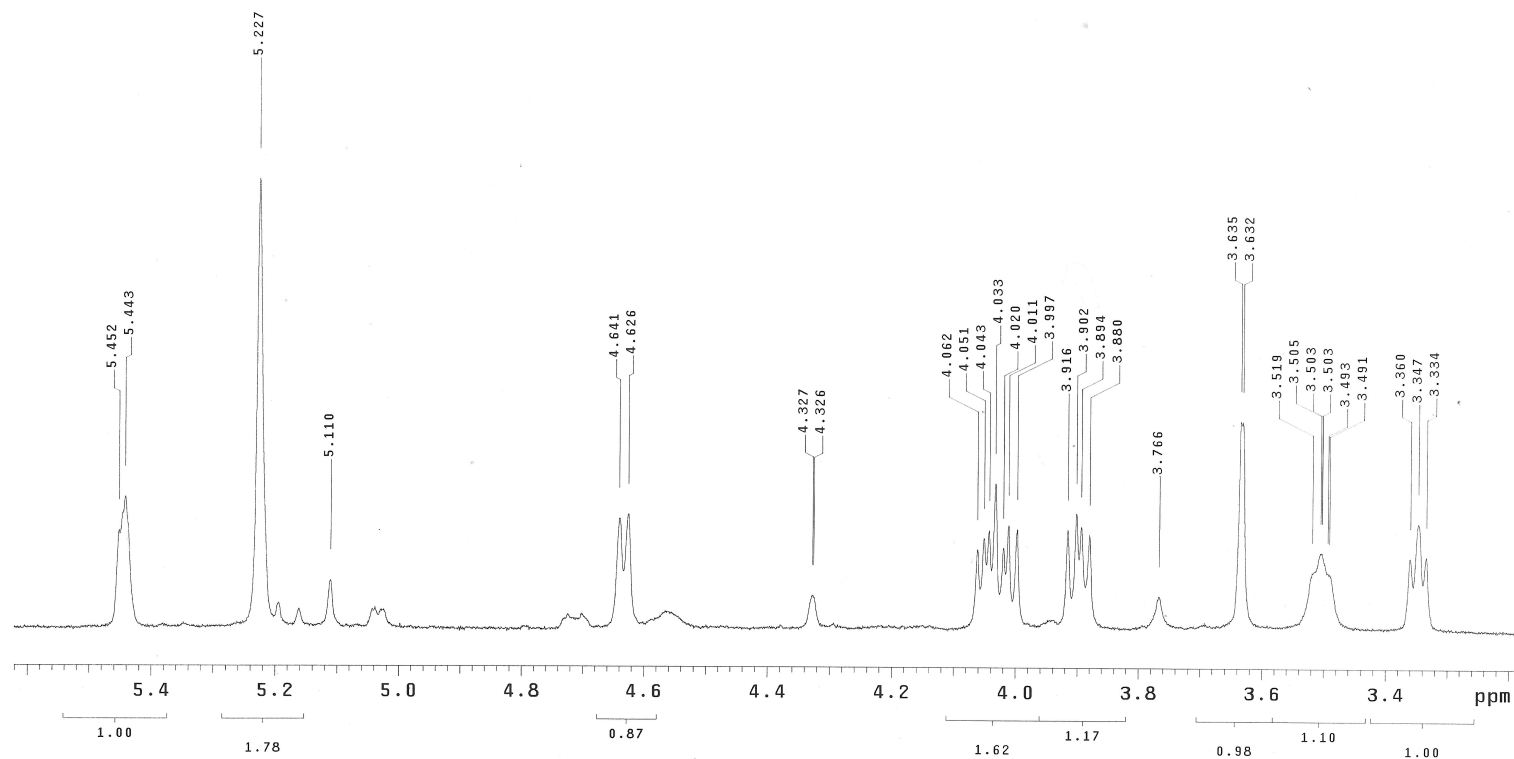

Supplement: s1 [file s1]
